# Supplementary material for: PAH and PCB in soils of Switzerland—status and critical review
Source: Royal Society of Chemistry journal article supplement (doi:10.1039/b807206j), 2008-01-01
Supplement: b807206j.pdf [file b807206j.pdf]

# Supplement Information to

## PAH and PCB in soils of Switzerland - Status and critical review

**Table S1:** Site description and soil analytical data of the Swiss soil monitoring network

| Site number                                                | 1                   | 2                 | 3                | 4            | 5                | 6                   | 7                 | 8                | 9                    |
|------------------------------------------------------------|---------------------|-------------------|------------------|--------------|------------------|---------------------|-------------------|------------------|----------------------|
| <b>Site description</b>                                    |                     |                   |                  |              |                  |                     |                   |                  |                      |
| Altitude (m a.s.l.)                                        | 537                 | 668               | 488              | 478          | 475              | 1'915               | 581               | 695              | 324                  |
| Land use                                                   | intensive grassland | coniferous forest | arable land      | orchard      | viticulture      | extensive grassland | coniferous forest | deciduous forest | arable land          |
| Mean annual temperature (°C)                               | 7.1                 | 7.9               | 8.2              | 8.5          | 9.4              | 6                   | 7.3               | 7.6              | 9                    |
| Mean annual precipitation (mm)                             | 1'173               | 1'128             | 1'023            | 575          | 1'058            | 1'251               | 967               | 947              | 790                  |
| population density <sup>a)</sup> (pers. km <sup>-1</sup> ) | 3'555               | 6'499             | 1'891            | 1'909        | 3'443            | 1'394               | 1'404             | 1'408            | 6'286                |
| Main emission source                                       | residential area    | residential area  | residential area | road traffic | residential area | residential area    | residential area  | residential area | city, chem. industry |
| Distance to main emission source (km)                      | 0.3                 | 1.5               | 0.3              | 0.5          | 0.4              | >3                  | 1.5               | 2                | 0.75                 |
| Type of area                                               | semi-rural          | residential       | semi-rural       | semi-rural   | semi-rural       | remote              | rural             | rural            | residential          |
| Position in relation to inversion layer                    | below               | below             | below            | below        | below            | above               | below             | within           | below                |
| Humus type                                                 | mull                | mull (moder)      | mull             | mull         | mull             | mull (moder)        | mull              | mull             | mull                 |
| <b>Soil analytical data (0-20 cm)</b>                      |                     |                   |                  |              |                  |                     |                   |                  |                      |
| Total organic carbon (%dw)                                 | 3.8                 | 3.4               | 1.2              | 1.7          | 1.6              | 5.8                 | 3.2               | 4.8              | 1.1                  |
| pH (0.01 M CaCl <sub>2</sub> )                             | 6.7                 | 4.7               | 6.5              | 7.2          | 7.4              | 3.6                 | 5.1               | 6.7              | 4.9                  |
| <b>PAH (µg/kg<sub>dw</sub>)</b>                            |                     |                   |                  |              |                  |                     |                   |                  |                      |
| PAH <sub>16</sub>                                          | 336                 | 438               | 204              | 110          | 582              | 62                  | 163               | 357              | 462                  |
| NAP naphthalene                                            | 9.1                 | 8.6               | 6.7              | 11           | 18               | 13                  | 7.4               | 35               | 7.6                  |
| ACY acenaphthylene                                         | 0.83                | 2.7               | 0.92             | 0.46         | 3.6              | 0.50                | 1.0               | 1.3              | 2.6                  |
| ACE acenaphthene                                           | 3.8                 | 2.2               | 1.5              | 6.2          | 4.3              | 3.1                 | 2.5               | 2.6              | 2.7                  |
| FLU fluoranthene                                           | 2.6                 | 2.3               | 1.3              | 3.2          | 5.1              | 3.2                 | 1.8               | 2.6              | 2.5                  |
| PHE phenanthrene                                           | 31                  | 36                | 67               | 19           | 108              | 27                  | 16                | 97               | 59                   |
| ANT anthracene                                             | 2.8                 | 3.5               | 1.2              | 1.1          | 3.9              | <0.2                | 0.99              | 1.3              | 2.2                  |
| FLT fluoranthene                                           | 57                  | 71                | 27               | 13           | 107              | 4.6                 | 27                | 48               | 76                   |
| PYR pyrene                                                 | 44                  | 54                | 17               | 9.9          | 82               | 2.6                 | 20                | 32               | 57                   |
| BaA benzo[a]anthracene                                     | 27                  | 29                | 9.2              | 6.3          | 44               | 0.85                | 8.7               | 14               | 28                   |
| CHR chrysene                                               | 32                  | 42                | 14               | 7.9          | 48               | 1.5                 | 15                | 23               | 39                   |
| BbF benzo[b]fluoranthene                                   | 32                  | 45                | 14               | 7.5          | 32               | 1.6                 | 17                | 25               | 44                   |
| BkF benzo[k]fluoranthene                                   | 17                  | 20                | 7.3              | 3.9          | 24               | 0.79                | 7.8               | 11               | 25                   |
| BaP benzo[a]pyrene                                         | 29                  | 56                | 13               | 7.4          | 41               | 1.6                 | 14                | 23               | 45                   |
| IPY idenol[1,2,3-cd]pyrene                                 | 22                  | 29                | 11               | 5.5          | 26               | 1.2                 | 11                | 18               | 33                   |
| DBA dibenz[a,h]anthracene                                  | 5.7                 | 7.7               | 2.5              | 1.3          | 2.2              | <0.04               | 2.3               | 4.0              | 6.9                  |
| BPE benzo[g,h,i]perylene                                   | 22                  | 29                | 11               | 6.0          | 31               | 1.4                 | 11                | 19               | 32                   |
| <b>PAH markers<sup>b)</sup></b>                            |                     |                   |                  |              |                  |                     |                   |                  |                      |
| cPHE                                                       | 3.1                 | 3.3               | 0.86             | 0.71         | 14               | 0.35                | 2.4               | 1.7              |                      |
| RET                                                        | 1.1                 | 2.0               | 0.89             | 0.76         | 17               | 0.81                | 3.3               | 3.6              |                      |
| cPYR                                                       | 0.95                | 1.3               | 0.68             | 0.29         | 16               | 0.15                | 1.4               | 1.3              |                      |
| PER                                                        | 5.2                 | 62                | 1.3              | 2.1          | 25               | 0.41                | 1.0               | 1.0              |                      |
| COR                                                        | 13                  | 20                | 4.9              | 3.6          | 19               | 1.5                 | 15                | 14               |                      |
| (MPHE/ANT)/PHE [-]                                         | 0.33                | 0.34              | 0.13             | 0.16         | 0.39             | 0.10                | 0.31              | 0.14             | 0.25                 |
| (MFLT/PYR)/PYR [-]                                         | 0.41                | 0.40              | 0.37             | 0.32         | 0.50             | 0.31                | 0.29              | 0.28             | 0.38                 |
| 1,7-/(1,7-& 2,6 DmPHE) [-]                                 | 0.56                | 0.58              | 0.58             | 0.54         | 0.63             | 0.54                | 0.58              | 0.61             | 0.57                 |
| <b>PCB (µg/kg<sub>dw</sub>)</b>                            |                     |                   |                  |              |                  |                     |                   |                  |                      |
| PCB <sub>7</sub>                                           | 0.98                | 5.8               | 1.1              | 0.63         | 2.1              | 0.61                | 2.1               | 2.8              | 2.2                  |
| PCB 28                                                     | <0.04               | <0.04             | 0.13             | <0.04        | 0.12             | <0.04               | <0.04             | 0.10             | 0.10                 |
| PCB 52                                                     | <0.04               | 0.19              | 0.10             | <0.04        | 0.39             | 0.14                | <0.04             | 0.41             | 0.24                 |
| PCB 101                                                    | <0.4                | 0.73              | <0.4             | <0.4         | <0.4             | <0.4                | <0.4              | 0.42             | <0.4                 |
| PCB 118                                                    | <0.2                | 0.25              | <0.2             | <0.2         | <0.2             | <0.2                | <0.2              | <0.2             | <0.2                 |
| PCB 138                                                    | <0.5                | 1.2               | <0.5             | <0.5         | <0.5             | <0.5                | <0.5              | <0.5             | <0.5                 |
| PCB 153                                                    | <0.5                | 2.0               | <0.5             | <0.5         | <0.5             | <0.5                | 0.79              | 0.73             | 0.54                 |
| PCB 180                                                    | <0.3                | 1.3               | <0.3             | <0.3         | <0.3             | <0.3                | 0.53              | 0.50             | 0.30                 |

<sup>a)</sup> inhabitants in the community of the sampling site<sup>b)</sup> cPHE: 4-Hcyclopenta[def]PHE, RET: retene, cPYR: cyclopenta[cd]PYR, COR: coronene, (MPHE&ANT)/PHE: ratio of methylPHE and -ANT to PHE, (MFLT&PYR)/PYR: ratio of methylFLT and -PYR to PYR, 1,7-/(1,7-&2,6-)DmPHE: the ratio of 1,7- to 1,7- and 2,6-dimethylPHE

| Site number                                                | 10                  | 11               | 12                 | 13               | 14                                | 15               | 16                  | 17               | 18                | 19               |
|------------------------------------------------------------|---------------------|------------------|--------------------|------------------|-----------------------------------|------------------|---------------------|------------------|-------------------|------------------|
| <b>Site description</b>                                    |                     |                  |                    |                  |                                   |                  |                     |                  |                   |                  |
| Altitude (m a.s.l.)                                        | 935                 | 515              | 380                | 455              | 440                               | 433              | 1'220               | 945              | 525               | 685              |
| Land use                                                   | extensive grassland | arable land      | conservation sites | arable land      | arable land                       | arable land      | extensive grassland | arable land      | coniferous forest | deciduous forest |
| Mean annual temperature (°C)                               | 8.5                 | 8.3              | 8.4                | 8.5              | 7.9                               | 9.1              | 4.1                 | 6.9              | 8.1               | 7.6              |
| Mean annual precipitation (mm)                             | 1'523               | 939              | 1'206              | 1'266            | 1'128                             | 994              | 1'044               | 1'176            | 1'163             | 1'007            |
| population density <sup>a)</sup> (pers. km <sup>-1</sup> ) | 2'165               | 2'037            | 1'724              | 1'490            | 3'985                             | 1'502            | 604                 | 1'411            | 3'131             | 4'608            |
| Main emission source                                       | residential area    | residential area | residential area   | residential area | residential and agricultural area | residential area | residential area    | residential area | residential area  | residential area |
| Distance to main emission source (km)                      | 1                   | 1.5              | 1.2                | 0.8              | 0.5                               | 1.5              | 2                   | 3                | 2                 | 2.5              |
| Type of area                                               | rural               | rural            | rural              | semi-rural       | residential and semi-rural        | semi-rural       | rural               | rural            | semi-rural        | semi-rural       |
| Position in relation to inversion layer                    | above               | below            | below              | below            | below                             | below            | below               | below            | below             | within           |
| Humus type                                                 | hydromull           | mull             | hydromull          | mull             | mull                              | wet mull         | mull                | mull             | mull (moder)      | mull             |
| <b>Soil analytical data (0-20 cm)</b>                      |                     |                  |                    |                  |                                   |                  |                     |                  |                   |                  |
| Total organic carbon (%dw)                                 | 4.2                 | 1.8              | 4.9                | 1.4              | 1.5                               | 15               | 3.8                 | 1.7              | 7.0               | 3.1              |
| pH (0.01 M CaCl <sub>2</sub> )                             | 4.8                 | 6.6              | 5.6                | 5.1              | 7.3                               | 6.0              | 5.4                 | 5.1              | 3.2               | 4.4              |
| <b>PAH (µg/kg<sub>dw</sub>)</b>                            |                     |                  |                    |                  |                                   |                  |                     |                  |                   |                  |
| PAH <sub>16</sub>                                          | 150                 | 250              | 230                |                  | 247                               | 347              | 67                  | 121              | 505               |                  |
| NAP naphthalene                                            | 6.9                 | 9.0              | 21                 |                  | 5.8                               | 45               | 5.6                 | 8.7              | 20                | 7.4              |
| ACY acenaphthylene                                         | 0.53                | 0.81             | 0.72               |                  | 0.54                              | 1.1              | <0.4                | <0.4             | 1.5               | 1.7              |
| ACE acenaphthene                                           | 1.6                 | 2.0              | 4.6                |                  | 3.3                               | 12               | 1.0                 | 2.3              | 3.7               | 1.5              |
| FLU fluoranthene                                           | 1.3                 | 1.5              | 4.3                |                  | 2.1                               | 7.2              | 1.0                 | 2.1              | 4.5               | 2.1              |
| PHE phenanthrene                                           | 18                  | 92               | 53                 |                  | 83                                | 101              | 34                  | 44               | 67                | 21               |
| ANT anthracene                                             | 0.65                | 0.68             | 1.00               |                  | 0.43                              | 1.3              | <0.2                | 0.72             | 2.0               | 1.6              |
| FLT fluoranthene                                           | 22                  | 28               | 29                 |                  | 31                                | 38               | 6.6                 | 14               | 79                | 40               |
| PYR pyrene                                                 | 17                  | 19               | 21                 |                  | 21                                | 25               | 3.6                 | 9.2              | 59                | 29               |
| BaA benzo[a]anthracene                                     | 9.2                 | 11               | 10                 |                  | 11                                | 13               | 1.6                 | 4.2              | 24                | 13               |
| CHR chrysene                                               | 14                  | 17               | 18                 |                  | 15                                | 18               | 2.5                 | 7.0              | 44                | 22               |
| BbF benzo[b]fluoranthene                                   | 14                  | 17               | 16                 |                  | 18                                | 20               | 2.5                 | 6.6              | 51                | 24               |
| BkF benzo[k]fluoranthene                                   | 6.8                 | 8.5              | 7.7                |                  | 11                                | 10               | 1.7                 | 4.0              | 24                | 14               |
| BaP benzo[a]pyrene                                         | 13                  | 15               | 14                 |                  | 16                                | 20               | 2.3                 | 5.8              | 52                |                  |
| IPY ideno[1,2,3-cd]pyrene                                  | 10                  | 12               | 12                 |                  | 13                                | 15               | 1.4                 | 5.3              | 35                | 18               |
| DBA dibenz[a,h]anthracene                                  | 2.6                 | 3.6              | 2.8                |                  | 2.4                               | 3.9              | 0.58                | 0.72             | 7.0               | 3.1              |
| BPE benzo[g,h,i]perylene                                   | 12                  | 13               | 13                 |                  | 13                                | 15               | 2.5                 | 5.6              | 32                | 16               |
| <b>PAH markers<sup>b)</sup></b>                            |                     |                  |                    |                  |                                   |                  |                     |                  |                   |                  |
| cPHE                                                       | 1.4                 | 1.1              | 1.6                | 5.5              |                                   |                  | 0.73                | 1.1              | 4.5               | 3.4              |
| RET                                                        |                     | 0.75             | 1.5                | 1.8              |                                   |                  | 1.0                 | 1.3              | 2.8               | 3.9              |
| cPYR                                                       | 1.7                 | 1.3              | 1.5                | 8.3              |                                   |                  | 0.80                | 1.3              | 2.5               | 2.1              |
| PER                                                        | 3.5                 | 2.4              | 4.6                | 35               |                                   |                  | 1.6                 | 2.2              | 5.1               |                  |
| COR                                                        | 12                  | 6.5              | 14                 | 41               |                                   |                  | 1.9                 | 4.7              | 25                | 29               |
| (MPHE/ANT)/PHE [-]                                         | 0.24                | 0.10             | 0.27               | 0.31             | 0.11                              | 0.13             | 0.09                | 0.11             | 0.25              | 0.32             |
| (MFLT/PYR)/PYR [-]                                         | 0.36                | 0.37             | 0.33               | 0.38             | 0.39                              | 0.44             | 0.33                | 0.36             | 0.39              | 0.35             |
| 1,7-/(1,7-& 2,6 DmPHE) [-]                                 | 0.55                | 0.56             | 0.64               | 0.65             | 0.58                              | 0.59             | 0.60                | 0.60             | 0.60              | 0.61             |
| <b>PCB (µg/kg<sub>dw</sub>)</b>                            |                     |                  |                    |                  |                                   |                  |                     |                  |                   |                  |
| PCB <sub>7</sub>                                           | 1.3                 | 1.8              | 1.6                | 6.3              | 2.3                               | 1.9              | 0.83                | 1.6              | 6.1               | 3.2              |
| PCB 28                                                     | 0.07                | 0.18             | 0.05               | 0.11             | 0.19                              | 0.09             | <0.04               | 0.06             | 0.15              | <0.04            |
| PCB 52                                                     | <0.04               | 0.48             | 0.15               | 0.53             | 0.46                              | 0.50             | 0.17                | 0.19             | 0.24              | <0.04            |
| PCB 101                                                    | <0.4                | <0.4             | <0.4               | 0.92             | <0.4                              | 0.48             | <0.4                | <0.4             | 0.76              | <0.4             |
| PCB 118                                                    | <0.2                | <0.2             | <0.2               | 0.53             | <0.2                              | <0.2             | <0.2                | <0.2             | 0.54              | <0.2             |
| PCB 138                                                    | <0.5                | <0.5             | <0.5               | 1.2              | <0.5                              | <0.5             | <0.5                | <0.5             | 1.5               | 0.76             |
| PCB 153                                                    | <0.5                | <0.5             | <0.5               | 1.8              | <0.5                              | <0.5             | <0.5                | <0.5             | 1.7               | 1.2              |
| PCB 180                                                    | <0.3                | <0.3             | <0.3               | 1.3              | <0.3                              | <0.3             | <0.3                | <0.3             | 1.2               | 0.78             |

<sup>a)</sup> inhabitants in the community of the sampling site

<sup>b)</sup> cPHE: 4-Hcyclopenta[def]PHE, RET: retene, cPYR: cyclopenta[cd]PYR, COR: coronene, (MPHE&ANT)/PHE: ratio of methylPHE and -ANT to PHE, (MFLT&PYR)/PYR: ratio of methylFLT and -PYR to PYR, 1,7-/(1,7-&2,6-)DmPHE: the ratio of 1,7- to 1,7- and 2,6-dimethylPHE

| Site number                                                | 20               | 21               | 22                | 23              | 24               | 25               | 26               | 27               | 28               | 29           |
|------------------------------------------------------------|------------------|------------------|-------------------|-----------------|------------------|------------------|------------------|------------------|------------------|--------------|
| <b>Site description</b>                                    |                  |                  |                   |                 |                  |                  |                  |                  |                  |              |
| Altitude (m a.s.l.)                                        | 460              | 565              | 675               | 343             | 387              | 545              | 428              | 505              | 465              | 450          |
| Land use                                                   | orchard          | arable land      | coniferous forest | arable land     | deciduous forest | arable land      | arable land      | deciduous forest | arable land      | arable land  |
| Mean annual temperature (°C)                               | 8.3              | 7.7              | 7.6               | 9               | 8.3              | 8.4              | 9.2              | 9.2              | 8.5              | 8.3          |
| Mean annual precipitation (mm)                             | 1'179            | 1'000            | 1'144             | 1'013           | 1'007            | 816              | 930              | 872              | 992              | 1'159        |
| population density <sup>a)</sup> (pers. km <sup>-1</sup> ) | 1'756            | 4'142            | 1'717             | 3'069           | 3'165            | 1'297            | 3'089            | 1'391            | 1'808            | 2'294        |
| Main emission source                                       | residential area | residential area | residential area  | industrial area | cement industry  | residential area | residential area | residential area | residential area | road traffic |
| Distance to main emission source (km)                      | 1                | 0.2              | 1.5               | 2               | 1                | 1.5              | 0.75             | 1.7              | 2.5              | 0.05         |
| Type of area                                               | semi-rural       | residential      | rural             | semi-rural      | semi-rural       | rural            | semi-rural       | semi-rural       | rural            | semi-rural   |
| Position in relation to inversion layer                    | below            | below            | within            | below           | below            | below            | below            | below            | below            | below        |
| Humus type                                                 | mull             | mull             | mull (moder)      | mull            | mull             | mull             | mull             | mull             | mull             | mull         |
| <b>Soil analytical data (0-20 cm)</b>                      |                  |                  |                   |                 |                  |                  |                  |                  |                  |              |
| Total organic carbon (%dw)                                 | 2.0              | 1.5              | 4.0               | 1.3             | 2.8              | 2.3              | 1.1              | 2.4              | 1.4              | 2.3          |
| pH (0.01 M CaCl <sub>2</sub> )                             | 5.4              | 5.1              | 3.4               | 6.2             | 4.8              | 7.2              | 5.2              | 4.2              | 5.3              | 5.3          |
| <b>PAH (µg/kg<sub>dw</sub>)</b>                            |                  |                  |                   |                 |                  |                  |                  |                  |                  |              |
| PAH <sub>16</sub>                                          | 149              | 581              | 286               | 241             | 177              | 144              | 432              |                  | 134              | 158          |
| NAP naphthalene                                            | 12               | 9.6              | 6.5               | 8.1             | 8.8              | 15               | 7.2              | 6.4              | 6.9              | 15           |
| ACY acenaphthylene                                         | 0.76             | 2.4              | 1.2               | 0.80            | 0.90             | <0.4             | 1.4              | 1.1              | 0.57             | 0.86         |
| ACE acenaphthene                                           | 2.2              | 2.6              | 1.9               | 1.9             | 2.4              | 1.9              | 2.9              | 0.86             | 2.0              | 3.2          |
| FLU fluoranthene                                           | 2.4              | 3.9              | 1.9               | 1.9             | 1.5              | 1.8              | 2.6              | 1.8              | 2.1              | 2.7          |
| PHE phenanthrene                                           | 46               | 92               | 21                | 53              | 18               | 62               | 74               | 33               | 58               | 45           |
| ANT anthracene                                             | 0.40             | 6.1              | 1.7               | 0.90            | 1.1              | <0.2             | 4.1              | 0.91             | <0.2             | 0.46         |
| FLT fluoranthene                                           | 19               | 101              | 42                | 33              | 27               | 15               | 70               | 20               | 13               | 19           |
| PYR pyrene                                                 | 13               | 77               | 33                | 23              | 20               | 10               | 53               | 14               | 8.1              | 14           |
| BaA benzo[a]anthracene                                     | 6.6              | 43               | 16                | 13              | 9.6              | 2.9              | 36               | 6.9              | 4.4              | 5.1          |
| CHR chrysene                                               | 9.5              | 47               | 27                | 21              | 18               | 6.7              | 40               | 9.9              | 6.7              | 10           |
| BbF benzo[b]fluoranthene                                   | 9.9              | 45               | 30                | 21              | 18               | 6.7              | 34               | 8.5              | 7.6              | 10           |
| BkF benzo[k]fluoranthene                                   | 6.3              | 24               | 14                | 11              | 8.6              | 3.6              | 19               | 4.8              | 3.8              | 5.8          |
| BaP benzo[a]pyrene                                         | 8.1              | 50               | 47                | 19              | 15               | 5.5              | 33               |                  | 7.1              | 9.1          |
| IPY ideno[1,2,3-cd]pyrene                                  | 6.9              | 34               | 20                | 14              | 13               | 5.2              | 22               | 7.1              | 5.8              | 7.6          |
| DBA dibenz[a,h]anthracene                                  | 0.97             | 8.6              | 3.7               | 4.5             | 2.7              | 1.1              | 7.8              | 1.2              | 1.2              | 2.6          |
| BPE benzo[g,h,i]perylene                                   | 6.5              | 35               | 19                | 15              | 13               | 6.4              | 24               | 7.2              | 6.2              | 8.0          |
| <b>PAH markers<sup>b)</sup></b>                            |                  |                  |                   |                 |                  |                  |                  |                  |                  |              |
| cPHE                                                       | 1.1              | 6.6              |                   | 1.9             |                  | 1.4              | 4.9              | 1.9              | 1.2              | 2.9          |
| RET                                                        | 1.3              | 1.4              |                   | 1.6             |                  | 1.6              | 1.4              | 1.6              | 1.4              | 4.3          |
| cPYR                                                       | 1.2              | 3.0              |                   | 2.1             |                  | 1.9              | 1.9              | 1.6              | 1.7              | 4.0          |
| PER                                                        | 1.8              | 7.4              |                   | 2.3             |                  | 2.3              | 3.8              |                  | 1.7              | 25           |
| COR                                                        | 5.5              | 14               |                   | 8.0             |                  | 9.7              | 8.7              | 6.0              | 3.7              | 12           |
| (MPHE/ANT)/PHE [-]                                         | 0.14             | 0.27             | 0.35              | 0.14            | 0.32             | 0.09             | 0.26             | 0.16             | 0.10             | 0.13         |
| (MFLT/PYR)/PYR [-]                                         | 0.36             | 0.41             | 0.40              | 0.33            | 0.44             | 0.28             | 0.41             | 0.38             | 0.32             | 0.41         |
| 1,7-/(1,7-& 2,6 DmPHE) [-]                                 | 0.60             | 0.57             | 0.63              | 0.58            | 0.54             | 0.58             | 0.60             | 0.57             | 0.57             | 0.59         |
| <b>PCB (µg/kg<sub>dw</sub>)</b>                            |                  |                  |                   |                 |                  |                  |                  |                  |                  |              |
| PCB <sub>7</sub>                                           | 1.5              | 3.5              | 3.3               | 2.4             | 3.3              | 1.5              | 1.2              | 1.9              | 1.4              | 1.8          |
| PCB 28                                                     | 0.07             | 0.10             | <0.04             | 0.15            | <0.04            | 0.13             | 0.12             | 0.08             | 0.14             | 0.14         |
| PCB 52                                                     | 0.19             | 0.34             | 0.08              | 0.32            | 0.07             | 0.29             | 0.31             | 0.19             | 0.33             | 0.31         |
| PCB 101                                                    | <0.4             | 0.54             | 0.44              | <0.4            | <0.4             | <0.4             | <0.4             | <0.4             | <0.4             | <0.4         |
| PCB 118                                                    | <0.2             | <0.2             | 0.24              | <0.2            | <0.2             | <0.2             | <0.2             | <0.2             | <0.2             | <0.2         |
| PCB 138                                                    | <0.5             | 0.63             | 0.87              | <0.5            | 0.89             | <0.5             | <0.5             | <0.5             | <0.5             | <0.5         |
| PCB 153                                                    | <0.5             | 1.1              | 1.0               | 0.68            | 1.1              | <0.5             | <0.5             | 0.58             | <0.5             | <0.5         |
| PCB 180                                                    | <0.3             | 0.65             | 0.61              | 0.38            | 0.62             | <0.3             | <0.3             | 0.32             | <0.3             | <0.3         |

<sup>a)</sup> inhabitants in the community of the sampling site

<sup>b)</sup> cPHE: 4-Hyclopenta[def]PHE, RET: retene, cPYR: cylopenta[cd]PYR, COR: coronene, (MPHE&ANT)/PHE: ratio of methylPHE and -ANT to PHE, (MFLT&PYR)/PYR: ratio of methylFLT and -PYR to PYR, 1,7-/(1,7-&2,6-)DmPHE: the ratio of 1,7- to 1,7- and 2,6-dimethylPHE

| Site number                                                | 30                  | 31                  | 32                  | 33                  | 34                  | 35                  | 36               | 37                  | 38           | 39           |
|------------------------------------------------------------|---------------------|---------------------|---------------------|---------------------|---------------------|---------------------|------------------|---------------------|--------------|--------------|
| <b>Site description</b>                                    |                     |                     |                     |                     |                     |                     |                  |                     |              |              |
| Altitude (m a.s.l.)                                        | 635                 | 775                 | 1'215               | 431                 | 1'880               | 1'093               | 500              | 735                 | 478          | 534          |
| Land use                                                   | intensive grassland | arable land         | extensive grassland | intensive grassland | extensive grassland | intensive grassland | arable land      | intensive grassland | arable land  | arable land  |
| Mean annual temperature (°C)                               | 8.3                 | 6.8                 | 4.8                 | 8.8                 | 5.7                 | 5.3                 | 8.3              | 7.7                 | 8.5          | 8.3          |
| Mean annual precipitation (mm)                             | 1'159               | 1'146               | 1'375               | 1'699               | 1'587               | 1'400               | 1'154            | 963                 | 1'266        | 952          |
| population density <sup>a)</sup> (pers. km <sup>-1</sup> ) | 3'910               | 986                 | 730                 | 1'689               | 974                 | 816                 | 3'906            | 2'153               | 2'032        | 916          |
| Main emission source                                       | residential area    | tar recycling plant | residential area    | industrial area     | residential area    | residential area    | residential area | residential area    | road traffic | road traffic |
| Distance to main emission source (km)                      | 0.8                 | 1.5                 | 5                   | 0.1                 | 2.7                 | 0.25                | 0.5              | 2.5                 | 0.2          | 0.5          |
| Type of area                                               | semi-rural          | semi-rural          | remote              | semi-rural          | remote              | rural               | semi-rural       | semi-rural          | semi-rural   | semi-rural   |
| Position in relation to inversion layer                    | within              | within              | above               | below               | above               | above               | below            | within              | below        | below        |
| Humus type                                                 | mull                | mull                | mull                | hydromull           | mull                | mull                | mull             | mull                | mull         | mull         |
| <b>Soil analytical data (0-20 cm)</b>                      |                     |                     |                     |                     |                     |                     |                  |                     |              |              |
| Total organic carbon (%dw)                                 | 2.7                 | 2.2                 | 8.4                 | 4.6                 | 5.0                 | 3.3                 | 2.0              | 2.8                 | 1.7          | 3.0          |
| pH (0.01 M CaCl <sub>2</sub> )                             | 5.0                 | 6.5                 | 5.2                 | 6.2                 | 4.3                 | 5.7                 | 6.4              | 5.3                 | 5.9          | 7.3          |
| <b>PAH (µg/kg<sub>dw</sub>)</b>                            |                     |                     |                     |                     |                     |                     |                  |                     |              |              |
| PAH <sub>16</sub>                                          | 99                  | 2'690               | 157                 | 467                 | 79                  | 222                 | 140              | 96                  | 246          | 149          |
| NAP naphthalene                                            | 12                  | 19                  | 12                  | 32                  | 14                  | 9.7                 | 18               | 13                  | 7.6          | 13           |
| ACY acenaphthylene                                         | <0.4                | 26                  | 0.58                | 0.90                | <0.4                | 0.88                | 0.40             | <0.4                | 1.2          | 0.41         |
| ACE acenaphthene                                           | 1.7                 | 3.0                 | 5.1                 | 10                  | 2.2                 | 1.6                 | 2.1              | 1.7                 | 1.9          | 4.4          |
| FLU fluoranthene                                           | 1.2                 | 12                  | 2.9                 | 6.7                 | 3.0                 | 1.7                 | 1.7              | 1.4                 | 1.6          | 2.4          |
| PHE phenanthrene                                           | 19                  | 226                 | 26                  | 89                  | 36                  | 29                  | 60               | 26                  | 56           | 34           |
| ANT anthracene                                             | 0.34                | 19                  | 0.51                | 3.0                 | <0.2                | 0.91                | <0.2             | 0.48                | 0.91         | 0.51         |
| FLT fluoranthene                                           | 9.9                 | 431                 | 22                  | 78                  | 5.9                 | 31                  | 14               | 12                  | 27           | 19           |
| PYR pyrene                                                 | 7.4                 | 325                 | 16                  | 57                  | 3.3                 | 23                  | 8.2              | 8.3                 | 21           | 14           |
| BaA benzo[a]anthracene                                     | 4.5                 | 234                 | 6.0                 | 28                  | 1.0                 | 16                  | 4.3              | 4.0                 | 11           | 7.0          |
| CHR chrysene                                               | 7.3                 | 259                 | 12                  | 36                  | 2.0                 | 20                  | 6.3              | 5.4                 | 16           | 9.4          |
| BbF benzo[b]fluoranthene                                   | 8.6                 | 252                 | 13                  | 29                  | 2.0                 | 19                  | 5.9              | 5.0                 | 20           | 11           |
| BkF benzo[k]fluoranthene                                   | 4.0                 | 164                 | 7.1                 | 16                  | 1.1                 | 11                  | 2.9              | 2.7                 | 12           | 5.4          |
| BaP benzo[a]pyrene                                         | 8.3                 | 285                 | 11                  | 29                  | 3.0                 | 20                  | 4.9              | 4.7                 | 22           | 9.4          |
| IPY ideno[1,2,3-cd]pyrene                                  | 5.9                 | 206                 | 10                  | 24                  | 2.4                 | 18                  | 5.7              | 5.3                 | 21           | 7.9          |
| DBA dibenz[a,h]anthracene                                  | 1.3                 | 41                  | 1.6                 | 4.6                 | <0.04               | 3.1                 | 0.93             | 0.64                | 4.2          | 1.9          |
| BPE benzo[g,h,i]perylene                                   | 6.5                 | 189                 | 10                  | 23                  | 2.6                 | 17                  | 5.6              | 5.3                 | 23           | 9.3          |
| <b>PAH markers<sup>b)</sup></b>                            |                     |                     |                     |                     |                     |                     |                  |                     |              |              |
| cPHE                                                       |                     | 29                  |                     | 5.1                 | 1.4                 | 2.3                 | 1.6              | 1.5                 |              | 1.1          |
| RET                                                        |                     | 5.1                 |                     | 2.5                 | 2.1                 | 2.7                 | 2.6              | 2.0                 |              | 1.1          |
| cPYR                                                       |                     | 19                  |                     | 2.7                 | 2.2                 | 2.8                 | 2.4              | 2.2                 |              | 1.3          |
| PER                                                        |                     | 55                  |                     | 7.2                 | 4.5                 | 4.4                 | 3.2              | 3.0                 |              | 3.0          |
| COR                                                        |                     | 77                  |                     | 10                  | 2.6                 | 8.2                 | 4.8              | 3.7                 |              | 6.3          |
| (MPHE/ANT)/PHE [-]                                         | 0.16                | 0.55                | 0.19                | 0.17                | 0.09                | 0.22                | 0.12             | 0.15                | 0.13         | 0.15         |
| (MFLT/PYR)/PYR [-]                                         | 0.47                | 0.64                | 0.34                | 0.33                | 0.31                | 0.43                | 0.37             | 0.32                | 0.42         | 0.39         |
| 1,7-/(1,7-& 2,6 DmPHE) [-]                                 | 0.58                | 0.57                | 0.60                | 0.56                | 0.58                | 0.58                | 0.60             | 0.58                | 0.59         | 0.57         |
| <b>PCB (µg/kg<sub>dw</sub>)</b>                            |                     |                     |                     |                     |                     |                     |                  |                     |              |              |
| PCB <sub>7</sub>                                           | 1.2                 | 1.3                 | 1.1                 | 2.3                 | 0.89                | 0.76                | 1.4              | 1.5                 | 1.3          | 1.5          |
| PCB 28                                                     | <0.04               | 0.12                | <0.04               | 0.12                | 0.07                | 0.06                | 0.15             | 0.06                | 0.10         | 0.07         |
| PCB 52                                                     | 0.09                | 0.30                | 0.10                | 0.38                | 0.21                | 0.13                | 0.33             | 0.15                | 0.28         | 0.16         |
| PCB 101                                                    | <0.4                | <0.4                | <0.4                | <0.4                | <0.4                | <0.4                | <0.4             | <0.4                | <0.4         | <0.4         |
| PCB 118                                                    | <0.2                | <0.2                | <0.2                | <0.2                | <0.2                | <0.2                | <0.2             | <0.2                | <0.2         | <0.2         |
| PCB 138                                                    | <0.5                | <0.5                | <0.5                | <0.5                | <0.5                | <0.5                | <0.5             | <0.5                | <0.5         | <0.5         |
| PCB 153                                                    | <0.5                | <0.5                | <0.5                | 0.63                | <0.5                | <0.5                | <0.5             | <0.5                | <0.5         | <0.5         |
| PCB 180                                                    | <0.3                | <0.3                | <0.3                | 0.33                | <0.3                | <0.3                | <0.3             | <0.3                | <0.3         | <0.3         |

<sup>a)</sup> inhabitants in the community of the sampling site

<sup>b)</sup> cPHE: 4-Hcyclopenta[def]PHE, RET: retene, cPYR: cyclopenta[cd]PYR, COR: coronene, (MPHE&ANT)/PHE: ratio of methylPHE and -ANT to PHE, (MFLT&PYR)/PYR: ratio of methylFLT and -PYR to PYR, 1,7-/(1,7-&2,6-)DmPHE: the ratio of 1,7- to 1,7- and 2,6-dimethylPHE

| Site number                                                | 40                | 41                  | 42               | 43               | 44          | 45                | 46               | 47                | 48           | 49                  |
|------------------------------------------------------------|-------------------|---------------------|------------------|------------------|-------------|-------------------|------------------|-------------------|--------------|---------------------|
| <b>Site description</b>                                    |                   |                     |                  |                  |             |                   |                  |                   |              |                     |
| Altitude (m a.s.l.)                                        | 851               | 464                 | 580              | 622              | 417         | 1'180             | 439              | 1'655             | 409          | 1'100               |
| Land use                                                   | coniferous forest | extensive grassland | deciduous forest | deciduous forest | arable land | coniferous forest | arable land      | coniferous forest | arable land  | extensive grassland |
| Mean annual temperature (°C)                               | 7.4               | 8.5                 | 8.2              | 8.3              | 8.2         | 6.3               | 8.2              | 2.6               | 8            | 5.4                 |
| Mean annual precipitation (mm)                             | 1'106             | 1'266               | 1'023            | 1'354            | 1'093       | 1'652             | 1'023            | 1'007             | 1'334        | 1'562               |
| population density <sup>a)</sup> (pers. km <sup>-1</sup> ) | 1'855             | 1'636               | 1'984            | 2'517            | 1'581       | 1'400             | 1'154            | 1'932             | 1'751        | 1'163               |
| Main emission source                                       | residential area  | residential area    | residential area | road traffic     | railway     | residential area  | residential area | residential area  | road traffic | road traffic        |
| Distance to main emission source (km)                      | 1                 | 1.5                 | 2                | 0.5              | 0.2         | 3                 | 2.7              | 1.5               | 1.5          | 0.2                 |
| Type of area                                               | rural             | semi-rural          | rural            | rural            | semi-rural  | remote            | semi-rural       | semi-rural        | semi-rural   | rural               |
| Position in relation to inversion layer                    | within            | below               | below            | below            | below       | within            | below            | above             | below        | above               |
| Humus type                                                 | moder             | mull                | mull (moder)     | mull             | mull        | hydromull         | mull             | raw humus         | mull         | mull                |
| <b>Soil analytical data (0-20 cm)</b>                      |                   |                     |                  |                  |             |                   |                  |                   |              |                     |
| Total organic carbon (%dw)                                 | 4.9               | 2.7                 | 2.9              | 3.0              | 1.4         |                   | 2.3              | 12                | 14           | 4.7                 |
| pH (0.01 M CaCl <sub>2</sub> )                             | 3.5               | 4.7                 | 3.9              | 4.3              | 5.2         | 5.2               | 7.6              | 3.1               | 5.6          | 4.7                 |
| <b>PAH (µg/kg<sub>dw</sub>)</b>                            |                   |                     |                  |                  |             |                   |                  |                   |              |                     |
| PAH <sub>16</sub>                                          | 364               | 158                 | 104              | 138              | 150         | 305               | 122              | 116               | 226          | 119                 |
| NAP naphthalene                                            | 13                | 9.2                 | 7.7              | 7.1              | 9.5         | 26                | 16               | 15                | 36           | 17                  |
| ACY acenaphthylene                                         | 1.2               | 1.0                 | 0.45             | 0.75             | 0.54        | 1.5               | <0.4             | 0.45              | 0.98         | 0.47                |
| ACE acenaphthene                                           | 2.7               | 2.9                 | 2.3              | 1.5              | 2.4         | 7.3               | 2.5              | 3.0               | 13           | 2.9                 |
| FLU fluoranthene                                           | 3.0               | 1.8                 | 1.4              | 1.0              | 1.7         | 6.9               | 1.9              | 2.4               | 5.9          | 3.1                 |
| PHE phenanthrene                                           | 33                | 16                  | 15               | 17               | 29          | 96                | 50               | 33                | 61           | 36                  |
| ANT anthracene                                             | 1.6               | 0.72                | 0.41             | 0.63             | 0.66        | 0.80              | 0.20             | 0.50              | 1.2          | 0.54                |
| FLT fluoranthene                                           | 58                | 22                  | 14               | 22               | 19          | 28                | 13               | 13                | 26           | 15                  |
| PYR pyrene                                                 | 45                | 17                  | 11               | 17               | 15          | 20                | 8.4              | 9.5               | 16           | 11                  |
| BaA benzo[a]anthracene                                     | 22                | 11                  | 5.1              | 6.2              | 7.9         | 7.4               | 3.0              | 4.1               | 7.4          | 5.0                 |
| CHR chrysene                                               | 34                | 14                  | 8.5              | 12               | 12          | 19                | 4.9              | 6.5               | 11           | 5.9                 |
| BbF benzo[b]fluoranthene                                   | 33                | 12                  | 8.7              | 12               | 12          | 24                | 5.0              | 6.7               | 11           | 4.8                 |
| BkF benzo[k]fluoranthene                                   | 17                | 7.3                 | 4.2              | 6.6              | 6.3         | 7.7               | 2.6              | 3.3               | 5.5          | 2.6                 |
| BaP benzo[a]pyrene                                         | 43                | 17                  | 8.4              | 15               | 11          | 18                | 4.3              | 5.2               | 8.9          | 5.7                 |
| IPY ideno[1,2,3-cd]pyrene                                  | 26                | 12                  | 7.6              | 8.5              | 10          | 16                | 4.0              | 5.3               | 9.4          | 3.7                 |
| DBA dibenz[a,h]anthracene                                  | 5.0               | 2.4                 | 1.2              | 1.7              | 1.5         | 2.8               | 0.46             | 0.70              | 1.5          | 0.45                |
| BPE benzo[g,h,i]perylene                                   | 25                | 12                  | 7.2              | 9.4              | 11          | 22                | 4.5              | 6.7               | 9.6          | 4.6                 |
| <b>PAH markers<sup>b)</sup></b>                            |                   |                     |                  |                  |             |                   |                  |                   |              |                     |
| cPHE                                                       | 7.4               | 1.9                 | 1.6              |                  | 1.7         | 2.8               | 1.6              | 1.8               | 2.1          | 3.6                 |
| RET                                                        | 7.5               | 2.3                 | 1.6              |                  | 1.7         | 68                | 2.1              | 3.8               | 2.3          | 22                  |
| cPYR                                                       | 5.2               | 2.3                 | 1.8              |                  | 2.0         | 3.2               | 2.1              | 2.2               | 2.2          | 4.2                 |
| PER                                                        | 12                | 3.6                 | 3.2              |                  | 3.3         | 78                | 3.2              | 3.6               | 5.8          | 6.4                 |
| COR                                                        | 23                | 4.9                 | 5.1              |                  | 7.0         | 32                | 3.7              | 5.1               | 6.8          | 7.8                 |
| (MPHE/ANT)/PHE [-]                                         | 0.31              | 0.30                | 0.18             | 0.24             | 0.13        | 0.32              | 0.10             | 0.12              | 0.13         | 0.11                |
| (MFLT/PYR)/PYR [-]                                         | 0.36              | 0.45                | 0.32             | 0.40             | 0.35        | 0.69              | 0.28             | 0.30              | 0.30         | 0.22                |
| 1,7-(1,7-& 2,6 DmPHE) [-]                                  | 0.57              | 0.58                | 0.56             | 0.57             | 0.57        | 0.65              | 0.47             | 0.64              | 0.61         | 0.58                |
| <b>PCB (µg/kg<sub>dw</sub>)</b>                            |                   |                     |                  |                  |             |                   |                  |                   |              |                     |
| PCB <sub>7</sub>                                           | 2.5               | 0.86                | 1.9              | 2.0              | 2.2         | 4.4               | 1.3              | 1.7               | 2.3          | 1.5                 |
| PCB 28                                                     | 0.04              | 0.04                | <0.04            | <0.04            | 0.05        | 0.13              | 0.08             | 0.09              | 0.10         | 0.06                |
| PCB 52                                                     | 0.14              | 0.10                | 0.09             | 0.08             | 0.15        | 0.38              | 0.19             | 0.20              | 0.34         | 0.16                |
| PCB 101                                                    | <0.4              | <0.4                | <0.4             | <0.4             | <0.4        | 1.5               | <0.4             | <0.4              | <0.4         | <0.4                |
| PCB 118                                                    | 0.22              | <0.2                | 0.23             | <0.2             | 0.29        | 0.29              | <0.2             | 0.23              | 0.25         | <0.2                |
| PCB 138                                                    | <0.5              | <0.5                | <0.5             | 0.54             | <0.5        | 0.70              | <0.5             | <0.5              | <0.5         | <0.5                |
| PCB 153                                                    | 0.78              | <0.5                | 0.65             | 0.62             | 0.65        | 0.85              | <0.5             | <0.5              | 0.57         | 0.50                |
| PCB 180                                                    | 0.53              | <0.3                | 0.35             | 0.34             | 0.38        | 0.52              | <0.3             | <0.3              | 0.33         | <0.3                |

<sup>a)</sup> inhabitants in the community of the sampling site

<sup>b)</sup> cPHE: 4-Hcyclopenta[def]PHE, RET: retene, cPYR: cyclopenta[cd]PYR, COR: coronene, (MPHE&ANT)/PHE: ratio of methylPHE and -ANT to PHE, (MFLT&PYR)/PYR: ratio of methylFLT and -PYR to PYR, 1,7-(1,7-&2,6-)DmPHE: the ratio of 1,7- to 1,7- and 2,6-dimethylPHE

| Site number                                                | 50                  | 51           | 52                  | 53               | 54           | 55                | 56               | 57                  | 58                | 59               |
|------------------------------------------------------------|---------------------|--------------|---------------------|------------------|--------------|-------------------|------------------|---------------------|-------------------|------------------|
| <b>Site description</b>                                    |                     |              |                     |                  |              |                   |                  |                     |                   |                  |
| Altitude (m a.s.l.)                                        | 2'120               | 464          | 1'338               | 626              | 557          | 440               | 998              | 1'030               | 910               | 425              |
| Land use                                                   | extensive grassland | horticulture | extensive grassland | arable land      | arable land  | viticulture       | arable land      | extensive grassland | coniferous forest | horticulture     |
| Mean annual temperature (°C)                               | -0.2                | 8.8          | 5.4                 | 7.6              | 7.7          | 9.4               | 4                | 6                   | 6.7               | 7.9              |
| Mean annual precipitation (mm)                             | 2'327               | 1'047        | 1'696               | 947              | 1'000        | 944               | 1'350            | 1'330               | 1'397             | 1'006            |
| population density <sup>a)</sup> (pers. km <sup>-1</sup> ) | 344                 | 1'866        | 1'204               | 1'833            | 1'844        | 4'879             | 1'146            | 814                 | 2'188             | 3'425            |
| Main emission source                                       | residential area    | road traffic | army training       | residential area | road traffic | petrol combustion | residential area | timber industry     | residential area  | residential area |
| Distance to main emission source (km)                      | >3                  | 0.4          | 0                   | 3                | 0.1          | 0.3               | 3                | 0.5                 | 2                 | 0.8              |
| Type of area                                               | remote              | semi-rural   | rural               | rural            | rural        | semi-rural        | rural            | rural               | rural             | semi-rural       |
| Position in relation to inversion layer                    | above               | below        | above               | within           | below        | below             | above            | below               | above             | below            |
| Humus type                                                 | mull                | mull         | mull                | mull             | mull         | mull              | mull             | mull                | humified          | mod hydromull    |
| <b>Soil analytical data (0-20 cm)</b>                      |                     |              |                     |                  |              |                   |                  |                     |                   |                  |
| Total organic carbon (%dw)                                 | 4.3                 | 1.4          | 4.2                 | 2.8              | 1.1          | 1.1               | 3.1              | 4.0                 | 6.1               | 2.9              |
| pH (0.01 M CaCl <sub>2</sub> )                             | 3.9                 | 7.2          | 5.3                 | 7.2              | 6.1          | 7.2               | 4.3              | 6.0                 | 3.5               | 6.9              |
| <b>PAH (µg/kg<sub>dw</sub>)</b>                            |                     |              |                     |                  |              |                   |                  |                     |                   |                  |
| PAH <sub>16</sub>                                          | 54                  | 49           | 157                 | 423              | 69           | 1'034             | 89               | 72                  | 140               | 237              |
| NAP naphthalene                                            | 9.9                 | 8.9          | 9.8                 | 21               | 8.5          | 13                | 16               | 14                  | 11                | 15               |
| ACY acenaphthylene                                         | <0.4                | <0.4         | <0.4                | 0.66             | <0.4         | 4.5               | 0.43             | <0.4                | 0.42              | 0.47             |
| ACE acenaphthene                                           | 3.1                 | 2.4          | 1.9                 | 2.1              | <0.8         | 2.0               | 4.1              | 1.8                 | 3.8               | 3.3              |
| FLU fluoranthene                                           | 2.1                 | 1.3          | 1.5                 | 1.9              | 0.65         | 5.0               | 2.6              | 1.5                 | 2.7               | 2.2              |
| PHE phenanthrene                                           | 29                  | 14           | 25                  | 55               | 14           | 133               | 25               | 27                  | 26                | 42               |
| ANT anthracene                                             | <0.2                | 0.27         | 0.40                | 1.4              | 0.35         | 9.7               | 0.30             | <0.2                | 0.52              | 1.6              |
| FLT fluoranthene                                           | 3.7                 | 4.9          | 16                  | 57               | 8.8          | 192               | 7.4              | 7.0                 | 19                | 33               |
| PYR pyrene                                                 | 1.9                 | 3.6          | 13                  | 46               | 6.9          | 145               | 5.4              | 4.6                 | 14                | 27               |
| BaA benzo[a]anthracene                                     | 0.51                | 1.6          | 9.9                 | 31               | 3.3          | 88                | 2.8              | 1.7                 | 5.3               | 17               |
| CHR chrysene                                               | 0.75                | 2.4          | 16                  | 39               | 4.9          | 105               | 4.4              | 2.9                 | 11                | 20               |
| BbF benzo[b]fluoranthene                                   | 0.73                | 2.2          | 16                  | 38               | 5.0          | 80                | 5.2              | 2.8                 | 12                | 16               |
| BkF benzo[k]fluoranthene                                   | 0.39                | 1.3          | 7.3                 | 21               | 2.6          | 48                | 2.2              | 1.6                 | 5.8               | 9.5              |
| BaP benzo[a]pyrene                                         | 0.51                | 2.0          | 13                  | 37               | 4.2          | 94                | 4.4              | 2.6                 | 9.9               | 17               |
| IPY ideno[1,2,3-cd]pyrene                                  | 0.66                | 2.0          | 12                  | 32               | 4.4          | 54                | 3.9              | 2.2                 | 8.2               | 14               |
| DBA dibenz[a,h]anthracene                                  | <0.04               | <0.04        | 1.9                 | 5.9              | 0.55         | 12                | 0.51             | 0.27                | 1.4               | 3.2              |
| BPE benzo[g,h,i]perylene                                   | 1.1                 | 2.1          | 12                  | 33               | 4.6          | 48                | 4.2              | 2.8                 | 8.8               | 15               |
| <b>PAH markers<sup>b)</sup></b>                            |                     |              |                     |                  |              |                   |                  |                     |                   |                  |
| cPHE                                                       | 1.3                 | 1.3          | 1.7                 | 3.0              | 1.5          | 12                | 1.6              | 1.4                 |                   | 2.6              |
| RET                                                        | 1.8                 | 1.8          | 2.1                 | 2.0              | 2.1          | 2.6               | 2.1              | 2.2                 |                   | 2.6              |
| cPYR                                                       | 1.9                 | 1.9          | 2.2                 | 2.6              | 2.0          | 6.7               | 2.1              | 2.0                 |                   | 2.7              |
| PER                                                        | 2.7                 | 2.9          | 4.2                 | 6.8              | 3.2          | 10                | 3.1              | 2.9                 |                   | 5.7              |
| COR                                                        | 1.9                 | 0.73         | 10.0                | 17               | 3.0          | 13                | 3.9              | 2.2                 |                   | 8.3              |
| (MPHE/ANT)/PHE [-]                                         | 0.09                | 0.10         | 0.17                | 0.16             | 0.14         | 0.39              | 0.10             | 0.09                | 0.14              | 0.18             |
| (MFLT/PYR)/PYR [-]                                         | 0.22                | 0.27         | 0.39                | 0.36             | 0.30         | 0.45              | 0.32             | 0.28                | 0.35              | 0.36             |
| 1,7-/(1,7-& 2,6 DmPHE) [-]                                 | 0.55                | 0.59         | 0.53                | 0.60             | 0.62         | 0.62              | 0.59             | 0.59                | 0.60              | 0.59             |
| <b>PCB (µg/kg<sub>dw</sub>)</b>                            |                     |              |                     |                  |              |                   |                  |                     |                   |                  |
| PCB <sub>7</sub>                                           | 0.84                | 0.74         | 1.2                 | 1.6              | 0.78         | 0.91              | 1.0              | 0.63                | 2.0               | 2.1              |
| PCB 28                                                     | 0.06                | 0.04         | 0.06                | 0.07             | <0.04        | 0.06              | 0.09             | 0.05                | <0.04             | 0.07             |
| PCB 52                                                     | 0.15                | 0.10         | 0.15                | 0.21             | 0.06         | 0.15              | 0.16             | 0.13                | 0.14              | 0.23             |
| PCB 101                                                    | <0.4                | <0.4         | <0.4                | <0.4             | <0.4         | <0.4              | <0.4             | <0.4                | <0.4              | <0.4             |
| PCB 118                                                    | <0.2                | <0.2         | <0.2                | <0.2             | <0.2         | <0.2              | <0.2             | <0.2                | <0.2              | 0.37             |
| PCB 138                                                    | <0.5                | <0.5         | <0.5                | <0.5             | <0.5         | <0.5              | <0.5             | <0.5                | <0.5              | <0.5             |
| PCB 153                                                    | <0.5                | <0.5         | <0.5                | <0.5             | <0.5         | <0.5              | <0.5             | <0.5                | 0.63              | 0.52             |
| PCB 180                                                    | <0.3                | <0.3         | <0.3                | <0.3             | <0.3         | <0.3              | <0.3             | <0.3                | 0.36              | <0.3             |

<sup>a)</sup> inhabitants in the community of the sampling site

<sup>b)</sup> cPHE: 4-Hcyclopenta[def]PHE, RET: retene, cPYR: cyclopenta[cd]PYR, COR: coronene, (MPHE&ANT)/PHE: ratio of methylPHE and -ANT to PHE, (MFLT&PYR)/PYR: ratio of methylFLT and -PYR to PYR, 1,7-/(1,7-&2,6-)DmPHE: the ratio of 1,7- to 1,7- and 2,6-dimethylPHE

| Site number                                                | 60                  | 61         | 62               | 63               | 64           | 65               | 66               | 67               | 68               | 69                  |
|------------------------------------------------------------|---------------------|------------|------------------|------------------|--------------|------------------|------------------|------------------|------------------|---------------------|
| <b>Site description</b>                                    |                     |            |                  |                  |              |                  |                  |                  |                  |                     |
| Altitude (m a.s.l.)                                        | 955                 | 445        | 1'065            | 450              | 375          | 482              | 540              | 432              | 435              | 818                 |
| Land use                                                   | intensive grassland | urban park | deciduous forest | arable land      | orchard      | arable land      | deciduous forest | horticulture     | arable land      | intensive grassland |
| Mean annual temperature (°C)                               | 7                   | 7.1        | 5.3              | 7.7              | 9.1          | 7.5              | 8                | 9.1              | 9.4              | 6.8                 |
| Mean annual precipitation (mm)                             | 1'796               | 1'173      | 1'146            | 1'054            | 833          | 1'055            | 897              | 985              | 944              | 1'311               |
| population density <sup>a)</sup> (pers. km <sup>-1</sup> ) | 1'578               | 4'459      | 3'257            | 2'107            | 1'770        | 1'159            | 974              | 1'266            | 2'325            | 2'474               |
| Main emission source                                       | residential area    | urban      | residential area | residential area | road traffic | residential area | cement industry  | residential area | residential area | residential area    |
| Distance to main emission source (km)                      | 3.5                 | 0.5        | 3                | 1                | 0.4          | 1.3              | 4.25             | 4                | 0.5              | 1                   |
| Type of area                                               | rural               | urban      | rural            | semi-rural       | semi-rural   | rural            | rural            | semi-rural       | semi-rural       | rural               |
| Position in relation to inversion layer                    | above               | below      | above            | below            | below        | below            | below            | below            | below            | above               |
| Humus type                                                 | hydromull           | mull       | mull (moder)     | mull             | mull         | mull             | mull             | mull             | mull             | mull                |
| <b>Soil analytical data (0-20 cm)</b>                      |                     |            |                  |                  |              |                  |                  |                  |                  |                     |
| Total organic carbon (%dw)                                 | 3.7                 | 2.1        | 4.2              | 2.0              | 4.1          | 1.2              | 6.2              | 23               | 1.4              | 3.2                 |
| pH (0.01 M CaCl <sub>2</sub> )                             | 5.2                 | 4.8        | 4.9              | 5.3              | 7.2          | 5.5              | 6.9              | 7.0              | 5.9              | 5.8                 |
| <b>PAH (µg/kg<sub>dw</sub>)</b>                            |                     |            |                  |                  |              |                  |                  |                  |                  |                     |
| PAH <sub>16</sub>                                          | 158                 | 646        | 176              | 219              | 264          | 234              | 175              | 350              | 159              | 97                  |
| NAP naphthalene                                            | 12                  | 18         | 21               | 13               | 14           | 7.9              | 16               | 17               | 9.2              | 10                  |
| ACY acenaphthylene                                         | 0.41                | 5.0        | 0.84             | 1.7              | 0.69         | 0.84             | 0.60             | 1.1              | 0.67             | <0.4                |
| ACE acenaphthene                                           | 5.0                 | 1.8        | 2.3              | 1.5              | 6.5          | 1.2              | 5.0              | 7.4              | 1.4              | 1.4                 |
| FLU fluoranthene                                           | 2.7                 | 2.1        | 2.4              | 2.1              | 3.4          | 1.3              | 3.2              | 3.6              | 1.5              | 1.3                 |
| PHE phenanthrene                                           | 34                  | 51         | 34               | 30               | 43           | 37               | 60               | 32               | 29               | 25                  |
| ANT anthracene                                             | <0.2                | 4.2        | 0.78             | 1.2              | 1.00         | 0.62             | 0.52             | 1.9              | 0.47             | 0.36                |
| FLT fluoranthene                                           | 19                  | 80         | 23               | 32               | 34           | 45               | 21               | 49               | 20               | 11                  |
| PYR pyrene                                                 | 14                  | 70         | 16               | 24               | 26           | 32               | 14               | 39               | 16               | 8.4                 |
| BaA benzo[a]anthracene                                     | 8.3                 | 45         | 6.3              | 12               | 15           | 13               | 5.8              | 24               | 8.5              | 3.9                 |
| CHR chrysene                                               | 9.9                 | 51         | 12               | 17               | 20           | 18               | 8.7              | 28               | 12               | 5.9                 |
| BbF benzo[b]fluoranthene                                   | 13                  | 69         | 16               | 20               | 25           | 19               | 8.7              | 36               | 16               | 6.4                 |
| BkF benzo[k]fluoranthene                                   | 6.1                 | 31         | 5.9              | 9.7              | 11           | 9.6              | 4.8              | 17               | 7.8              | 3.3                 |
| BaP benzo[a]pyrene                                         | 12                  | 87         | 13               | 21               | 21           | 19               | 8.0              | 35               | 14               | 6.2                 |
| IPY idenol[1,2,3-cd]pyrene                                 | 9.7                 | 59         | 10               | 16               | 18           | 13               | 8.5              | 28               | 10               | 6.5                 |
| DBA dibenz[a,h]anthracene                                  | 1.4                 | 12         | 1.7              | 3.0              | 4.8          | 3.1              | 1.1              | 5.8              | 1.6              | 0.86                |
| BPE benzo[g,h,i]perylene                                   | 10                  | 61         | 11               | 16               | 20           | 13               | 9.7              | 28               | 11               | 5.7                 |
| <b>PAH markers<sup>b)</sup></b>                            |                     |            |                  |                  |              |                  |                  |                  |                  |                     |
| cPHE                                                       | 0.88                | 3.3        |                  | 1.4              | 1.7          | 1.9              | 1.3              | 1.8              | 0.76             | 0.65                |
| RET                                                        | 3.0                 | 1.4        |                  | 1.2              | 1.2          | 1.1              | 1.8              | 1.3              | 1.1              | 1.3                 |
| cPYR                                                       | 1.2                 | 2.2        |                  | 1.5              | 1.7          | 1.6              | 1.6              | 1.7              | 1.4              | 1.3                 |
| PER                                                        | 4.4                 | 3.3        |                  | 2.4              | 5.2          | 1.8              | 2.2              | 10               | 2.5              | 2.5                 |
| COR                                                        | 7.5                 | 30         |                  | 8.2              | 14           | 6.1              | 11               | 11               | 4.2              | 3.7                 |
| (MPHE/ANT)/PHE [-]                                         | 0.11                | 0.27       | 0.15             | 0.20             | 0.20         | 0.17             | 0.11             | 0.21             | 0.16             | 0.12                |
| (MFLT/PYR)/PYR [-]                                         | 0.37                | 0.39       | 0.35             | 0.37             | 0.42         | 0.37             | 0.33             | 0.35             | 0.45             | 0.36                |
| 1,7-/(1,7-& 2,6 DmPHE) [-]                                 | 0.59                | 0.57       | 0.60             | 0.58             | 0.57         | 0.55             | 0.59             | 0.58             | 0.58             | 0.57                |
| <b>PCB (µg/kg<sub>dw</sub>)</b>                            |                     |            |                  |                  |              |                  |                  |                  |                  |                     |
| PCB <sub>7</sub>                                           | 0.94                | 1.7        | 2.0              | 1.1              | 1.8          | 0.85             | 1.7              | 1.7              | 0.63             | 0.63                |
| PCB 28                                                     | 0.07                | 0.07       | <0.04            | <0.04            | 0.07         | 0.07             | 0.11             | 0.06             | <0.04            | 0.05                |
| PCB 52                                                     | 0.15                | 0.17       | 0.12             | <0.04            | 0.17         | 0.16             | 0.33             | 0.13             | <0.04            | <0.04               |
| PCB 101                                                    | <0.4                | <0.4       | <0.4             | <0.4             | <0.4         | <0.4             | <0.4             | <0.4             | <0.4             | <0.4                |
| PCB 118                                                    | <0.2                | <0.2       | <0.2             | <0.2             | 0.24         | <0.2             | <0.2             | 0.26             | <0.2             | <0.2                |
| PCB 138                                                    | <0.5                | <0.5       | 0.52             | <0.5             | <0.5         | <0.5             | <0.5             | <0.5             | <0.5             | <0.5                |
| PCB 153                                                    | <0.5                | 0.50       | 0.55             | <0.5             | 0.55         | <0.5             | <0.5             | <0.5             | <0.5             | <0.5                |
| PCB 180                                                    | <0.3                | <0.3       | 0.36             | <0.3             | <0.3         | <0.3             | <0.3             | <0.3             | <0.3             | <0.3                |

<sup>a)</sup> inhabitants in the community of the sampling site

<sup>b)</sup> cPHE: 4-Hcyclopenta[def]PHE, RET: retene, cPYR: cyclopenta[cd]PYR, COR: coronene, (MPHE&ANT)/PHE: ratio of methylPHE and -ANT to PHE, (MFLT&PYR)/PYR: ratio of methylFLT and -PYR to PYR, 1,7-/(1,7-&2,6-)DmPHE: the ratio of 1,7- to 1,7- and 2,6-dimethylPHE

| Site number                                                | 70                  | 71                  | 72                  | 73                | 74                  | 75                 | 76                | 77                 | 78               | 79               |
|------------------------------------------------------------|---------------------|---------------------|---------------------|-------------------|---------------------|--------------------|-------------------|--------------------|------------------|------------------|
| <b>Site description</b>                                    |                     |                     |                     |                   |                     |                    |                   |                    |                  |                  |
| Altitude (m a.s.l.)                                        | 1'105               | 1'818               | 2'118               | 1'560             | 526                 | 2'400              | 1'690             | 830                | 532              | 684              |
| Land use                                                   | extensive grassland | extensive grassland | extensive grassland | coniferous forest | intensive grassland | conservation sites | coniferous forest | arable land        | arable land      | arable land      |
| Mean annual temperature (°C)                               | 5.4                 | 1.8                 | -0.7                | 2.6               | 8.3                 | 0.2                | 4.4               | 9.1                | 8.5              | 7.2              |
| Mean annual precipitation (mm)                             | 1'245               | 1'700               | 1'173               | 1'007             | 1'179               | 722                | 696               | 951                | 1'005            | 1'106            |
| population density <sup>a)</sup> (pers. km <sup>-1</sup> ) | 1'320               | 412                 | 717                 | 590               | 1'877               | 731                | 1'088             | 1'654              | 3'152            | 1'166            |
| Main emission source                                       | residential area    | residential area    | road traffic        | residential area  | residential area    | road traffic       | residential area  | waste incineration | residential area | residential area |
| Distance to main emission source (km)                      | 0.8                 | 3                   | 3                   | 2                 | 0.5                 | 1.8                | 1.5               | 2.5                | 0.8              | 1                |
| Type of area                                               | rural               | rural               | remote              | rural             | semi-rural          | remote             | rural             | rural              | semi-rural       | rural            |
| Position in relation to inversion layer                    | above               | above               | above               | above             | below               | above              | above             | above              | below            | below            |
| Humus type                                                 | mull                | mull                | mull                | moder/mull        | mull                | mull               | mull (moder)      | mull               | mull             | mull             |
| <b>Soil analytical data (0-20 cm)</b>                      |                     |                     |                     |                   |                     |                    |                   |                    |                  |                  |
| Total organic carbon (%dw)                                 | 3.5                 | 4.9                 | 6.3                 | 5.6               | 5.0                 | 3.6                | 5.2               | 2.4                | 3.3              | 1.0              |
| pH (0.01 M CaCl <sub>2</sub> )                             | 5.1                 | 4.4                 | 4.7                 | 4.3               | 5.4                 | 4.9                | 4.9               | 6.7                | 7.1              | 5.1              |
| <b>PAH (µg/kg<sub>dw</sub>)</b>                            |                     |                     |                     |                   |                     |                    |                   |                    |                  |                  |
| PAH <sub>16</sub>                                          | 97                  | 81                  | 64                  | 97                | 187                 | 32                 | 79                | 38                 | 222              | 484              |
| NAP naphthalene                                            | 7.1                 | 12                  | 12                  | 9.5               | 15                  | 5.8                | 8.9               | 6.5                | 11               | 8.4              |
| ACY acenaphthylene                                         | <0.4                | <0.4                | <0.4                | <0.4              | 0.78                | <0.4               | <0.4              | <0.4               | 0.65             | 0.59             |
| ACE acenaphthene                                           | 2.2                 | 2.3                 | 2.8                 | 3.3               | 4.0                 | 2.3                | 4.3               | 1.1                | 4.7              | 2.5              |
| FLU fluoranthene                                           | 1.5                 | 3.1                 | 2.5                 | 2.7               | 2.8                 | 1.4                | 2.3               | 0.97               | 3.8              | 2.2              |
| PHE phenanthrene                                           | 21                  | 50                  | 28                  | 42                | 46                  | 13                 | 38                | 13                 | 48               | 63               |
| ANT anthracene                                             | 0.63                | <0.2                | <0.2                | 0.24              | 0.83                | <0.2               | <0.2              | <0.2               | 4.0              | 5.1              |
| FLT fluoranthene                                           | 11                  | 5.2                 | 4.8                 | 10.0              | 23                  | 2.4                | 7.1               | 3.2                | 33               | 86               |
| PYR pyrene                                                 | 8.6                 | 2.1                 | 2.6                 | 5.8               | 17                  | 1.4                | 3.7               | 2.3                | 26               | 69               |
| BaA benzo[a]anthracene                                     | 5.5                 | 0.51                | 0.78                | 1.7               | 8.5                 | 0.38               | 1.1               | 1.1                | 15               | 50               |
| CHR chrysene                                               | 6.8                 | 0.84                | 1.3                 | 3.4               | 11                  | 0.72               | 2.2               | 1.5                | 15               | 43               |
| BbF benzo[b]fluoranthene                                   | 7.4                 | 0.96                | 1.7                 | 4.4               | 12                  | 0.99               | 2.8               | 1.4                | 12               | 29               |
| BkF benzo[k]fluoranthene                                   | 3.6                 | 0.52                | 0.85                | 2.0               | 6.3                 | 0.45               | 1.3               | 0.88               | 7.4              | 20               |
| BaP benzo[a]pyrene                                         | 7.0                 | 0.89                | 1.3                 | 3.3               | 12                  | 0.60               | 2.1               | 2.0                | 14               | 50               |
| IPY ideno[1,2,3-cd]pyrene                                  | 7.0                 | 0.85                | 2.6                 | 3.6               | 13                  | 0.92               | 2.7               | 1.3                | 11               | 23               |
| DBA dibenz[a,h]anthracene                                  | 1.1                 | <0.04               | <0.04               | 0.56              | 1.8                 | <0.04              | 0.34              | 0.19               | 3.2              | 8.4              |
| BPE benzo[g,h,i]perylene                                   | 6.1                 | 1.1                 | 2.2                 | 3.6               | 12                  | 1.1                | 2.4               | 1.7                | 13               | 23               |
| <b>PAH markers<sup>b)</sup></b>                            |                     |                     |                     |                   |                     |                    |                   |                    |                  |                  |
| cPHE                                                       | 0.70                | 0.43                | 0.44                | 0.58              | 1.0                 | 0.37               | 0.45              | 1.4                | 3.0              | 6.7              |
| RET                                                        | 2.7                 | 4.8                 | 1.2                 | 15                | 1.3                 | 1.1                | 9.1               | 3.3                | 2.7              | 2.7              |
| cPYR                                                       | 1.2                 | 1.1                 | 1.2                 | 1.2               | 1.5                 | 1.1                | 1.1               | 3.4                | 3.6              | 3.7              |
| PER                                                        | 3.2                 | 2.1                 | 2.2                 | 2.4               | 3.8                 | 2.1                | 2.2               | 4.2                | 4.9              | 9.1              |
| COR                                                        | 3.2                 | 1.4                 | 2.7                 | 2.7               | 8.3                 | 1.5                | 1.9               | 0.91               | 8.6              | 8.1              |
| (MPHE/ANT)/PHE [-]                                         | 0.13                | 0.07                | 0.09                | 0.12              | 0.12                | 0.10               | 0.10              | 0.11               | 0.17             | 0.31             |
| (MFLT/PYR)/PYR [-]                                         | 0.39                | 0.31                | 0.27                | 0.38              | 0.33                | 0.28               | 0.38              | 0.33               | 0.34             | 0.44             |
| 1,7-/(1,7-& 2,6 DmPHE) [-]                                 | 0.67                | 0.78                | 0.57                | 0.82              | 0.60                | 0.56               | 0.83              | 0.66               | 0.62             | 0.57             |
| <b>PCB (µg/kg<sub>dw</sub>)</b>                            |                     |                     |                     |                   |                     |                    |                   |                    |                  |                  |
| PCB <sub>7</sub>                                           | 0.76                | 0.91                | 0.77                | 1.8               | 1.9                 | 0.49               | 1.3               | 0.69               | 1.5              | 0.93             |
| PCB 28                                                     | <0.04               | 0.08                | <0.04               | <0.04             | 0.07                | <0.04              | 0.07              | <0.04              | 0.06             | 0.07             |
| PCB 52                                                     | <0.04               | 0.26                | 0.16                | 0.28              | 0.15                | <0.04              | 0.20              | 0.11               | 0.19             | 0.22             |
| PCB 101                                                    | <0.4                | <0.4                | <0.4                | <0.4              | <0.4                | <0.4               | <0.4              | <0.4               | <0.4             | <0.4             |
| PCB 118                                                    | <0.2                | <0.2                | <0.2                | <0.2              | <0.2                | <0.2               | <0.2              | <0.2               | <0.2             | <0.2             |
| PCB 138                                                    | <0.5                | <0.5                | <0.5                | <0.5              | <0.5                | <0.5               | <0.5              | <0.5               | <0.5             | <0.5             |
| PCB 153                                                    | <0.5                | <0.5                | <0.5                | <0.5              | 0.60                | <0.5               | <0.5              | <0.5               | <0.5             | <0.5             |
| PCB 180                                                    | <0.3                | <0.3                | <0.3                | <0.3              | 0.42                | <0.3               | <0.3              | <0.3               | <0.3             | <0.3             |

<sup>a)</sup> inhabitants in the community of the sampling site

<sup>b)</sup> cPHE: 4-Hcyclopenta[def]PHE, RET: retene, cPYR: cyclopenta[cd]PYR, COR: coronene, (MPHE&ANT)/PHE: ratio of methylPHE and -ANT to PHE, (MFLT&PYR)/PYR: ratio of methylFLT and -PYR to PYR, 1,7-/(1,7-&2,6-)DmPHE: the ratio of 1,7- to 1,7- and 2,6-dimethylPHE



| Site number                                                | 80               | 81                | 82               | 83                | 84                 | 85               | 86                | 87               | 88                | 89                 |
|------------------------------------------------------------|------------------|-------------------|------------------|-------------------|--------------------|------------------|-------------------|------------------|-------------------|--------------------|
| <b>Site description</b>                                    |                  |                   |                  |                   |                    |                  |                   |                  |                   |                    |
| Altitude (m a.s.l.)                                        | 538              | 1'355             | 441              | 1'040             | 597                | 383              | 618               | 559              | 1'358             | 1'825              |
| Land use                                                   | arable land      | coniferous forest | deciduous forest | coniferous forest | conservation sites | deciduous forest | arable land       | arable land      | coniferous forest | conservation sites |
| Mean annual temperature (°C)                               | 7.5              | 6                 | 9.4              | 5.5               | 7.9                | 8.3              | 7.2               | 7.7              | 4.5               | 0.2                |
| Mean annual precipitation (mm)                             | 1'055            | 1'315             | 981              | 1'727             | 1'301              | 887              | 1'268             | 919              | 1'526             | 722                |
| population density <sup>a)</sup> (pers. km <sup>-1</sup> ) | 932              | 1'018             | 1'063            | 2'906             | 1'359              | 2'896            | 1'702             | 1'512            | 1'115             | 2'150              |
| Main emission source                                       | residential area | road traffic      | road traffic     | residential area  | residential area   | residential area | chemical industry | residential area | residential area  | residential area   |
| Distance to main emission source (km)                      | 2                | 0.15              | 0.25             | 3                 | 1                  | 2                | 0.2               | 0.6              | >3                | 1                  |
| Type of area                                               | rural            | rural             | semi-rural       | rural             | semi-rural         | semi-rural       | rural             | semi-rural       | rural             | semi-rural         |
| Position in relation to inversion layer                    | below            | above             | below            | above             | below              | below            | below             | below            | above             | above              |
| Humus type                                                 | mull             | mull              | mull             | mull (moder)      | peat               | mull             | mull              | mull             | mull              | peat               |
| <b>Soil analytical data (0-20 cm)</b>                      |                  |                   |                  |                   |                    |                  |                   |                  |                   |                    |
| Total organic carbon (%dw)                                 | 1.5              | 4.4               | 4.3              | 7.6               | 43                 | 5.3              | 1.8               | 1.5              | 11                | 38                 |
| pH (0.01 M CaCl <sub>2</sub> )                             | 5.3              | 4.0               | 7.2              | 3.3               | 2.9                | 7.1              | 5.2               | 5.5              | 5.9               | 4.7                |
| <b>PAH (µg/kg<sub>dw</sub>)</b>                            |                  |                   |                  |                   |                    |                  |                   |                  |                   |                    |
| PAH <sub>16</sub>                                          | 87               | 183               | 181              | 486               | 853                | 675              | 125               | 121              | 259               | 471                |
| NAP naphthalene                                            | 7.4              | 20                | 29               | 11                | 99                 | 13               | 7.0               | 6.8              | 22                | 47                 |
| ACY acenaphthylene                                         | <0.4             | 0.55              | 0.68             | 1.3               | 9.4                | 1.4              | 0.58              | 0.60             | 0.77              | 1.0                |
| ACE acenaphthene                                           | <0.8             | 4.2               | 10               | 6.2               | 36                 | 7.7              | 1.2               | 0.84             | 7.4               | 23                 |
| FLU fluoranthene                                           | 0.78             | 5.1               | 4.4              | 4.6               | 25                 | 4.7              | 1.2               | 0.98             | 4.4               | 11                 |
| PHE phenanthrene                                           | 20               | 83                | 51               | 53                | 270                | 58               | 16                | 17               | 52                | 238                |
| ANT anthracene                                             | 0.36             | 0.29              | 0.69             | 2.1               | 6.4                | 4.4              | 0.68              | 0.53             | 0.92              | 1.2                |
| FLT fluoranthene                                           | 12               | 18                | 17               | 74                | 95                 | 108              | 17                | 17               | 37                | 42                 |
| PYR pyrene                                                 | 8.4              | 11                | 13               | 56                | 66                 | 93               | 13                | 13               | 26                | 25                 |
| BaA benzo[a]anthracene                                     | 4.4              | 4.2               | 6.2              | 23                | 24                 | 58               | 8.7               | 8.2              | 11                | 9.3                |
| CHR chrysene                                               | 6.6              | 7.7               | 9.9              | 47                | 44                 | 61               | 11                | 11               | 19                | 13                 |
| BbF benzo[b]fluoranthene                                   | 5.8              | 7.0               | 8.4              | 63                | 40                 | 57               | 11                | 9.8              | 19                | 13                 |
| BkF benzo[k]fluoranthene                                   | 3.6              | 3.5               | 4.5              | 24                | 23                 | 32               | 5.7               | 5.1              | 9.2               | 6.5                |
| BaP benzo[a]pyrene                                         | 4.8              | 5.2               | 6.7              | 43                | 29                 | 61               | 13                | 12               | 16                | 9.2                |
| IPY idenol[1,2,3-cd]pyrene                                 | 5.9              | 5.6               | 7.3              | 36                | 38                 | 50               | 8.0               | 8.3              | 16                | 15                 |
| DBA dibenz[a,h]anthracene                                  | 1.1              | 1.1               | 1.6              | 7.4               | 8.3                | 12               | 1.3               | 1.4              | 2.2               | 2.5                |
| BPE benzo[g,h,i]perylene                                   | 5.9              | 6.2               | 9.5              | 34                | 39                 | 53               | 9.7               | 8.6              | 17                | 15                 |
| <b>PAH markers<sup>b)</sup></b>                            |                  |                   |                  |                   |                    |                  |                   |                  |                   |                    |
| cPHE                                                       | 1.7              | 1.9               | 1.9              |                   | 7.1                | 6.3              | 1.6               | 1.5              | 2.4               | 2.2                |
| RET                                                        | 2.6              | 3.4               | 3.5              |                   | 36                 | 4.0              | 1.9               | 2.4              | 5.4               | 185                |
| cPYR                                                       | 3.5              | 3.6               | 3.6              |                   | 8.8                | 5.6              | 2.7               | 9.3              | 3.4               | 3.2                |
| PER                                                        | 2.6              | 2.9               | 3.4              |                   | 9.0                | 16               | 2.2               | 1.7              | 4.0               | 224                |
| COR                                                        | 4.1              | 4.8               | 8.4              |                   | 27                 | 28               | 5.5               | 4.5              | 12                | 13                 |
| (MPHE/ANT)/PHE [-]                                         | 0.14             | 0.09              | 0.24             | 0.22              | 0.17               | 0.37             | 0.19              | 0.19             | 0.15              | 0.09               |
| (MFLT/PYR)/PYR [-]                                         | 0.31             | 0.30              | 0.40             | 0.34              | 0.31               | 0.41             | 0.39              | 0.39             | 0.31              | 0.70               |
| 1,7-(1,7-& 2,6 DmPHE) [-]                                  | 0.56             | 0.61              | 0.62             | 0.58              | 0.79               | 0.60             | 0.56              | 0.59             | 0.65              | 0.62               |
| <b>PCB (µg/kg<sub>dw</sub>)</b>                            |                  |                   |                  |                   |                    |                  |                   |                  |                   |                    |
| PCB <sub>7</sub>                                           | 0.83             | 1.8               | 2.0              | 8.3               | 12                 | 2.0              | 1.1               | 0.90             | 2.1               | 3.9                |
| PCB 28                                                     | <0.04            | 0.13              | 0.10             | 0.22              | 0.41               | <0.04            | <0.04             | <0.04            | 0.07              | <0.04              |
| PCB 52                                                     | 0.12             | 0.43              | 0.19             | 0.20              | 1.5                | 0.12             | 0.07              | 0.08             | 0.23              | 1.2                |
| PCB 101                                                    | <0.4             | <0.4              | <0.4             | 0.86              | 2.8                | <0.4             | <0.4              | <0.4             | <0.4              | 0.98               |
| PCB 118                                                    | <0.2             | <0.2              | 0.26             | 0.50              | 0.91               | 0.23             | <0.2              | <0.2             | <0.2              | 0.21               |
| PCB 138                                                    | <0.5             | <0.5              | <0.5             | 2.4               | 1.9                | <0.5             | <0.5              | <0.5             | <0.5              | 0.53               |
| PCB 153                                                    | <0.5             | <0.5              | 0.59             | 2.5               | 2.7                | <0.5             | <0.5              | <0.5             | 0.57              | 0.67               |
| PCB 180                                                    | <0.3             | <0.3              | 0.32             | 1.7               | 1.7                | 0.35             | <0.3              | <0.3             | 0.39              | 0.33               |

<sup>a)</sup> inhabitants in the community of the sampling site

<sup>b)</sup> cPHE: 4-Hcyclopenta[def]PHE, RET: retene, cPYR: cylopenta[cd]PYR, COR: coronene, (MPHE&ANT)/PHE: ratio of methylPHE and -ANT to PHE, (MFLT&PYR)/PYR: ratio of methylFLT and -PYR to PYR, 1,7-(1,7-&2,6-)DmPHE: the ratio of 1,7- to 1,7- and 2,6-dimethylPHE

| Site number                                                | 90                | 91                | 92               | 93               | 94               | 95           | 96               | 97         | 98                  | 99                |
|------------------------------------------------------------|-------------------|-------------------|------------------|------------------|------------------|--------------|------------------|------------|---------------------|-------------------|
| <b>Site description</b>                                    |                   |                   |                  |                  |                  |              |                  |            |                     |                   |
| Altitude (m a.s.l.)                                        | 1'245             | 1'517             | 1'080            | 405              | 209              | 336          | 265              | 273        | 455                 | 830               |
| Land use                                                   | coniferous forest | coniferous forest | deciduous forest | deciduous forest | horticulture     | arable land  | viticulture      | urban park | extensive grassland | coniferous forest |
| Mean annual temperature (°C)                               | 6.6               | 5.3               | 9.2              | 7.8              | 10.6             | 9.8          | 10.6             | 11.4       | 8.6                 | 8.2               |
| Mean annual precipitation (mm)                             | 1'548             | 1'628             | 2'277            | 933              | 1'916            | 1'645        | 1'916            | 1'726      | 1'208               | 550               |
| population density <sup>a)</sup> (pers. km <sup>-1</sup> ) | 645               | 153               | 2'256            | 1'293            | 842              | 2'647        | 1'350            | 5'526      | 2'279               | 2'528             |
| Main emission source                                       | residential area  | residential area  | residential area | residential area | combustion plant | road traffic | residential area | city       | road traffic        | chemical industry |
| Distance to main emission source (km)                      | 2.3               | 0.7               | 2                | 1                | 0.5              | 0.15         | 0.15             | 0.2        | 0.2                 | 1.6               |
| Type of area                                               | rural             | remote            | rural            | semi-rural       | semi-rural       | semi-rural   | semi-rural       | urban      | semi-rural          | semi-rural        |
| Position in relation to inversion layer                    | above             | above             | above            | below            | below            | below        | below            | below      | below               | within            |
| Humus type                                                 | humified          | mod/moder/mull    | mull (moder)     | mull             | mull             | mull         | mull             | mull       | mull                | mull (moder)      |
| <b>Soil analytical data (0-20 cm)</b>                      |                   |                   |                  |                  |                  |              |                  |            |                     |                   |
| Total organic carbon (%dw)                                 | 12                | 6.8               | 11               | 2.2              | 1.8              | 1.2          | 3.8              | 2.3        | 4.4                 | 5.0               |
| pH (0.01 M CaCl <sub>2</sub> )                             | 3.4               | 3.7               | 3.7              | 4.6              | 6.4              | 6.0          | 6.1              | 5.0        | 5.9                 | 5.4               |
| <b>PAH (µg/kg<sub>dw</sub>)</b>                            |                   |                   |                  |                  |                  |              |                  |            |                     |                   |
| PAH <sub>16</sub>                                          | 152               | 92                | 161              | 84               | 71               | 243          | 68               | 8'465      | 195                 | 326               |
| NAP naphthalene                                            | 20                | 12                | 14               | 6.5              | <5.1             | 9.8          | 6.1              | 42         | <5.1                | 7.5               |
| ACY acenaphthylene                                         | 0.47              | 0.60              | 0.98             | 1.2              | <0.4             | 0.41         | <0.4             | 26         | <0.4                | 0.48              |
| ACE acenaphthene                                           | 8.9               | 3.7               | 7.8              | 2.1              | 2.7              | 1.4          | 2.5              | 28         | 2.2                 | 7.5               |
| FLU fluoranthene                                           | 4.3               | 2.8               | 3.6              | 1.4              | 1.6              | 1.1          | 1.7              | 22         | 1.4                 | 4.1               |
| PHE phenanthrene                                           | 40                | 34                | 31               | 12               | 15               | 39           | 25               | 517        | 25                  | 49                |
| ANT anthracene                                             | 0.59              | <0.2              | 0.52             | 0.55             | 0.53             | 4.0          | <0.2             | 75         | 1.8                 | 3.4               |
| FLT fluoranthene                                           | 14                | 6.9               | 16               | 11               | 8.7              | 37           | 6.6              | 1'375      | 30                  | 50                |
| PYR pyrene                                                 | 11                | 4.5               | 12               | 8.7              | 6.7              | 29           | 4.2              | 1'128      | 24                  | 38                |
| BaA benzo[a]anthracene                                     | 4.5               | 1.8               | 4.9              | 4.0              | 2.8              | 19           | 1.9              | 660        | 13                  | 17                |
| CHR chrysene                                               | 8.1               | 3.4               | 11               | 6.0              | 4.7              | 20           | 2.7              | 740        | 17                  | 31                |
| BbF benzo[b]fluoranthene                                   | 9.2               | 4.6               | 14               | 6.2              | 4.8              | 18           | 3.8              | 737        | 17                  | 29                |
| BkF benzo[k]fluoranthene                                   | 4.5               | 2.0               | 7.2              | 3.1              | 2.9              | 9.2          | 1.6              | 445        | 9.9                 | 18                |
| BaP benzo[a]pyrene                                         | 6.9               | 3.3               | 9.3              | 11               | 4.4              | 22           | 2.9              | 1'129      | 17                  | 26                |
| IPY ideno[1,2,3-cd]pyrene                                  | 8.8               | 5.0               | 13               | 4.0              | 4.0              | 14           | 3.1              | 689        | 14                  | 20                |
| DBA dibenz[a,h]anthracene                                  | 1.4               | 0.55              | 1.6              | 0.79             | 0.41             | 3.1          | 0.57             | 110        | 3.2                 | 4.0               |
| BPE benzo[g,h,i]perylene                                   | 9.9               | 5.9               | 14               | 5.7              | 6.0              | 16           | 4.7              | 742        | 15                  | 21                |
| <b>PAH markers<sup>b)</sup></b>                            |                   |                   |                  |                  |                  |              |                  |            |                     |                   |
| cPHE                                                       | 1.4               | 1.3               |                  | 1.5              |                  | 2.2          | 0.60             |            |                     |                   |
| RET                                                        | 8.5               | 5.0               |                  | 2.8              |                  | 2.1          | 0.88             |            |                     |                   |
| cPYR                                                       | 2.8               | 3.0               |                  | 2.8              |                  | 2.9          | 0.95             |            |                     |                   |
| PER                                                        | 2.6               | 2.1               |                  | 1.7              |                  | 2.5          | 1.5              |            |                     |                   |
| COR                                                        | 8.2               | 7.7               |                  | 4.1              |                  | 7.4          | 2.7              |            |                     |                   |
| (MPHE/ANT)/PHE [-]                                         | 0.10              | 0.09              | 0.14             | 0.24             | 0.14             | 0.16         | 0.09             | 0.49       | 0.22                | 0.18              |
| (MFLT/PYR)/PYR [-]                                         | 0.51              | 0.29              | 0.43             | 0.33             | 0.28             | 0.32         | 0.29             | 0.33       | 0.40                | 0.39              |
| 1,7-/(1,7-& 2,6 DmPHE) [-]                                 | 0.74              | 0.72              | 0.59             | 0.62             | 0.58             | 0.57         | 0.53             | 0.53       | 0.53                | 0.63              |
| <b>PCB (µg/kg<sub>dw</sub>)</b>                            |                   |                   |                  |                  |                  |              |                  |            |                     |                   |
| PCB <sub>7</sub>                                           | 3.5               | 2.0               | 5.7              | 1.4              | 1.9              | 1.9          | 2.4              | 4.2        | 6.3                 | 2.9               |
| PCB 28                                                     | <0.04             | 0.07              | <0.04            | <0.04            | <0.04            | 0.05         | 0.06             | <0.04      | <0.04               | 0.20              |
| PCB 52                                                     | 0.16              | 0.25              | 0.16             | 0.07             | 0.04             | 0.13         | 0.12             | <0.04      | 0.13                | 0.16              |
| PCB 101                                                    | 0.52              | <0.4              | 0.49             | <0.4             | <0.4             | <0.4         | <0.4             | <0.4       | <0.4                | 0.57              |
| PCB 118                                                    | 0.32              | <0.2              | 0.24             | <0.2             | <0.2             | <0.2         | <0.2             | 0.24       | <0.2                | 0.23              |
| PCB 138                                                    | 0.59              | <0.5              | 1.6              | <0.5             | <0.5             | <0.5         | <0.5             | 1.1        | 0.52                | 0.61              |
| PCB 153                                                    | 1.1               | 0.53              | 1.7              | <0.5             | 0.56             | 0.61         | 0.75             | 1.4        | 1.7                 | 0.74              |
| PCB 180                                                    | 0.90              | 0.39              | 1.5              | 0.31             | 0.32             | 0.41         | 0.56             | 0.89       | 3.5                 | 0.43              |

<sup>a)</sup> inhabitants in the community of the sampling site

<sup>b)</sup> cPHE: 4-Hcyclopenta[def]PHE, RET: retene, cPYR: cyclopenta[cd]PYR, COR: coronene, (MPHE&ANT)/PHE: ratio of methylPHE and -ANT to PHE, (MFLT&PYR)/PYR: ratio of methylFLT and -PYR to PYR, 1,7-/(1,7-&2,6-)DmPHE: the ratio of 1,7- to 1,7- and 2,6-dimethylPHE

| Site number                                                | 100                 | 101              | 102              | 103          | 104                 | 105                 |
|------------------------------------------------------------|---------------------|------------------|------------------|--------------|---------------------|---------------------|
| <b>Site description</b>                                    |                     |                  |                  |              |                     |                     |
| Altitude (m a.s.l.)                                        | 2'340               | 730              | 379              | 431          | 1'025               | 1'138               |
| Land use                                                   | extensive grassland | viticulture      | arable land      | arable land  | extensive grassland | extensive grassland |
| Mean annual temperature (°C)                               | -1.6                | 8.5              | 9.1              | 10.1         | 7.2                 | 5.7                 |
| Mean annual precipitation (mm)                             | 2'099               | 575              | 881              | 1'015        | 1'307               | 1'245               |
| population density <sup>a)</sup> (pers. km <sup>-1</sup> ) | 582                 | 1'294            | 1'842            | 1'016        | 2'797               | 5'391               |
| Main emission source                                       | residential area    | residential area | residential area | road traffic | residential area    | residential area    |
| Distance to main emission source (km)                      | 1.5                 | 0.7              | 0.8              | 0.015        | >3                  | >3                  |
| Type of area                                               | remote              | semi-rural       | semi-rural       | semi-rural   | rural               | rural               |
| Position in relation to inversion layer                    | above               | below            | below            | below        | above               | above               |
| Humus type                                                 | mull                | mull             | mull             | mull         | mull                | mull                |
| <b>Soil analytical data (0-20 cm)</b>                      |                     |                  |                  |              |                     |                     |
| Total organic carbon (%dw)                                 | 4.9                 | 1.9              | 1.1              | 2.3          | 3.9                 | 5.8                 |
| pH (0.01 M CaCl <sub>2</sub> )                             | 4.3                 | 7.3              | 7.2              | 6.6          | 4.4                 | 6.2                 |
| <b>PAH (µg/kg<sub>dw</sub>)</b>                            |                     |                  |                  |              |                     |                     |
| PAH <sub>16</sub>                                          | 110                 | 629              | 479              |              | 106                 | 225                 |
| NAP naphthalene                                            | 8.7                 | 6.8              | 6.7              | 5.4          | 6.7                 | 8.5                 |
| ACY acenaphthylene                                         | <0.4                | 0.79             | 1.3              | 1.6          | 0.49                | 0.80                |
| ACE acenaphthene                                           | 5.3                 | 3.6              | 1.4              | 1.2          | 1.3                 | <0.8                |
| FLU fluoranthene                                           | 2.6                 | 2.2              | 1.9              | 1.6          | 1.6                 | 1.1                 |
| PHE phenanthrene                                           | 27                  | 44               | 34               | 28           | 26                  | 12                  |
| ANT anthracene                                             | 0.42                | 3.7              | 4.1              | 2.9          | 0.54                | 1.0                 |
| FLT fluoranthene                                           | 12                  | 92               | 98               | 73           | 14                  | 25                  |
| PYR pyrene                                                 | 8.8                 | 75               | 91               | 58           | 10                  | 21                  |
| BaA benzo[a]anthracene                                     | 3.9                 | 70               | 22               | 31           | 4.4                 | 15                  |
| CHR chrysene                                               | 5.6                 | 52               | 44               | 39           | 6.4                 | 18                  |
| BbF benzo[b]fluoranthene                                   | 7.9                 | 62               | 33               | 45           | 8.4                 | 22                  |
| BkF benzo[k]fluoranthene                                   | 3.5                 | 35               | 23               | 22           | 3.7                 | 12                  |
| BaP benzo[a]pyrene                                         | 5.9                 | 79               | 46               |              | 7.2                 | 50                  |
| IPY idenol[1,2,3-cd]pyrene                                 | 6.1                 | 47               | 34               | 35           | 5.9                 | 18                  |
| DBA dibenz[a,h]anthracene                                  | 1.1                 | 13               | 4.9              | 7.4          | 1.7                 | 3.1                 |
| BPE benzo[g,h,i]perylene                                   | 10.0                | 43               | 33               | 37           | 6.9                 | 18                  |
| <b>PAH markers<sup>b)</sup></b>                            |                     |                  |                  |              |                     |                     |
| cPHE                                                       | 0.86                | 4.1              | 6.8              | 4.4          | 0.92                | 1.8                 |
| RET                                                        | 1.2                 | 1.4              | 3.0              | 1.2          | 1.7                 | 1.2                 |
| cPYR                                                       | 1.2                 | 1.5              | 3.7              | 1.8          | 1.3                 | 2.1                 |
| PER                                                        | 2.2                 | 20               | 15               |              | 1.8                 | 3.4                 |
| COR                                                        | 6.1                 | 14               | 16               | 27           | 7.4                 | 10                  |
| (MPHE/ANT)/PHE [-]                                         | 0.12                | 0.37             | 0.46             | 0.38         | 0.14                | 0.39                |
| (MFLT/PYR)/PYR [-]                                         | 0.28                | 0.53             | 0.31             | 0.33         | 0.31                | 0.49                |
| 1,7-(1,7-& 2,6 DmPHE) [-]                                  | 0.54                | 0.59             | 0.63             | 0.56         | 0.75                | 0.59                |
| <b>PCB (µg/kg<sub>dw</sub>)</b>                            |                     |                  |                  |              |                     |                     |
| PCB <sub>7</sub>                                           | 0.68                | 2.0              | 1.0              | 6.0          | 1.2                 | 1.3                 |
| PCB 28                                                     | 0.08                | 0.08             | 0.05             | 0.04         | 0.06                | 0.06                |
| PCB 52                                                     | 0.19                | 0.20             | 0.09             | 0.46         | 0.12                | 0.22                |
| PCB 101                                                    | <0.4                | <0.4             | <0.4             | 1.0          | <0.4                | <0.4                |
| PCB 118                                                    | <0.2                | <0.2             | <0.2             | 0.97         | <0.2                | <0.2                |
| PCB 138                                                    | <0.5                | <0.5             | <0.5             | 1.2          | <0.5                | <0.5                |
| PCB 153                                                    | <0.5                | 0.54             | <0.5             | 1.6          | <0.5                | <0.5                |
| PCB 180                                                    | <0.3                | 0.40             | <0.3             | 0.70         | <0.3                | <0.3                |

<sup>a)</sup> inhabitants in the community of the sampling site

<sup>b)</sup> cPHE: 4-Hcyclopenta[def]PHE, RET: retene, cPYR: cyclopenta[cd]PYR, COR: coronene, (MPHE&ANT)/PHE: ratio of methylPHE and -ANT to PHE, (MFLT&PYR)/PYR: ratio of methylFLT and -PYR to PYR, 1,7-(1,7-&2,6-)DmPHE: the ratio of 1,7- to 1,7- and 2,6-dimethylPHE
